# Supplementary material
Source: MDPI journal article supplement (https://www.mdpi.com/1424-2818/15/7/853)
Supplement: s1 [file s1]

Supplementary material

Khrustaleva A.M. – Adaptive and Neutral Polymorphism of the *Onne-DAB* Gene from the Major Histocompatibility Complex (MHC) in Sockeye Salmon populations on the Asian Range

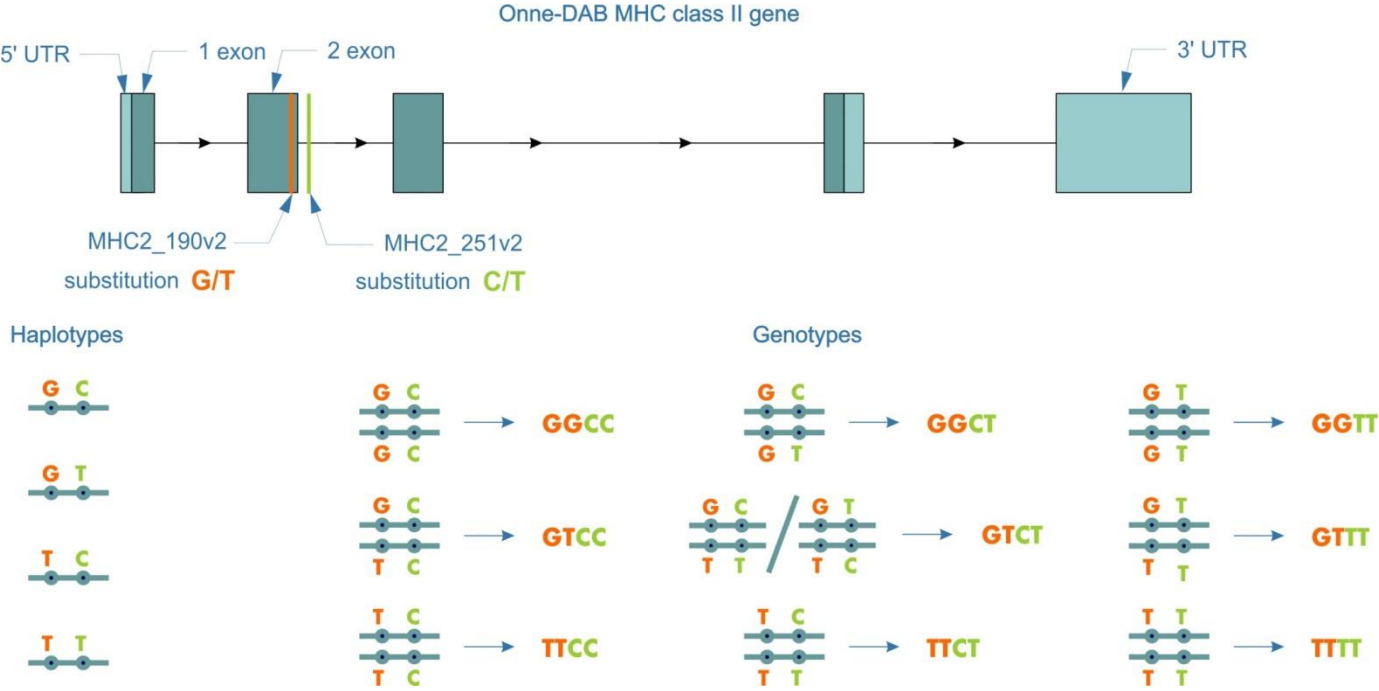

**Figure S1.** Scheme of the *Onne-DAB* gene in sockeye salmon, location of the *One\_MHC2\_190v2* and *One\_MHC2\_251v2* loci, and designation of haplotypes and genotypes of the combined *MHC2* locus.

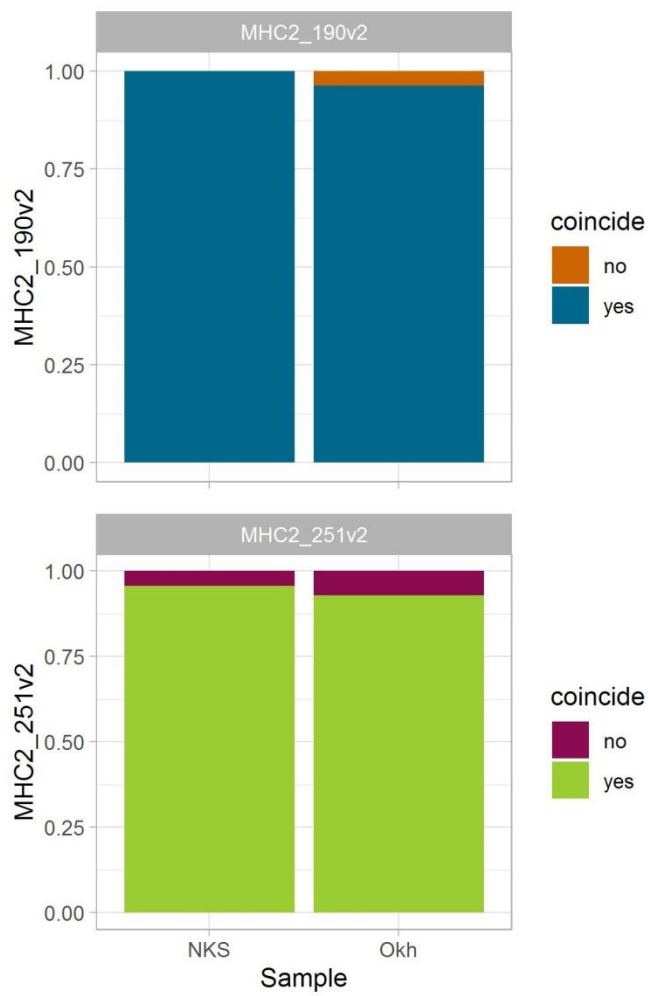

**Figure S2.** Percentage of coincidence of allele scores for the *MHC2\_190v2* and *MHC2\_251v2* loci in two samples, Okh and NKS.

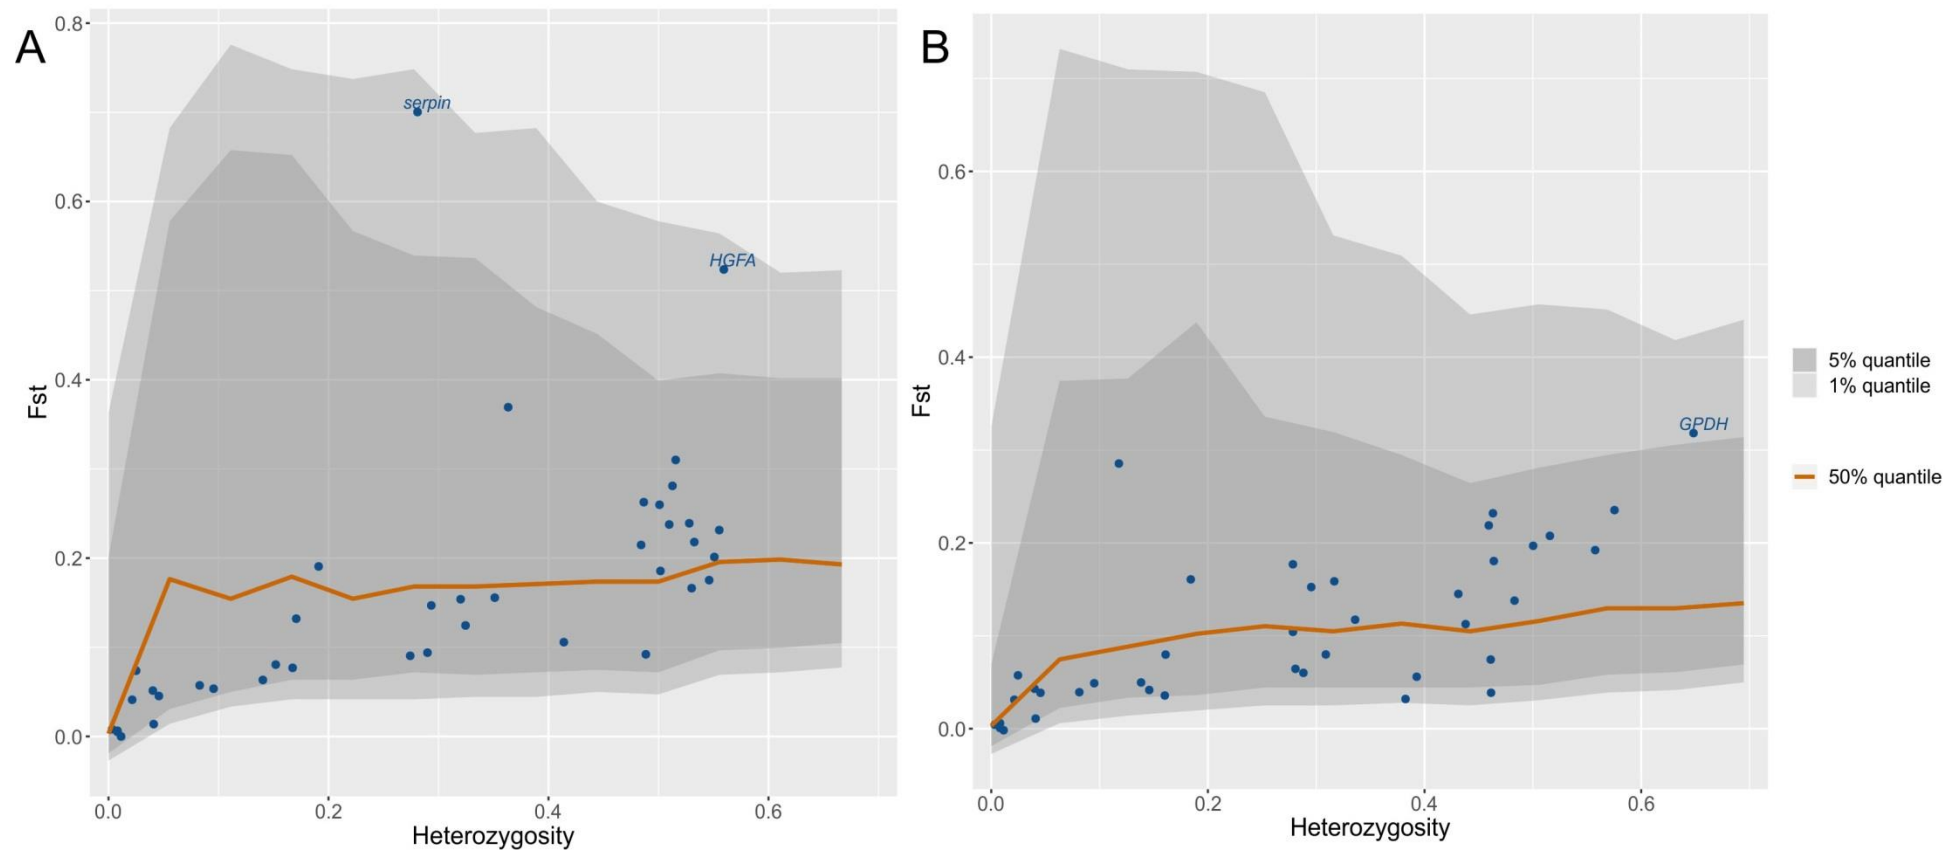

**Figure S3.** Examples of output images for outlier-SNP detection tests using Arlequin 3.5 for two combinations of samples: (A) – all continental samples vs all island populations, (B) – all samples vs BS sample. Loci falling above 5% (in the upper part of the graph) and below 1% (in the lower part of the graph) quantile limits were removed as outliers. Here *serpin*, *HGFA*, and *GPDH* are considered as outliers.

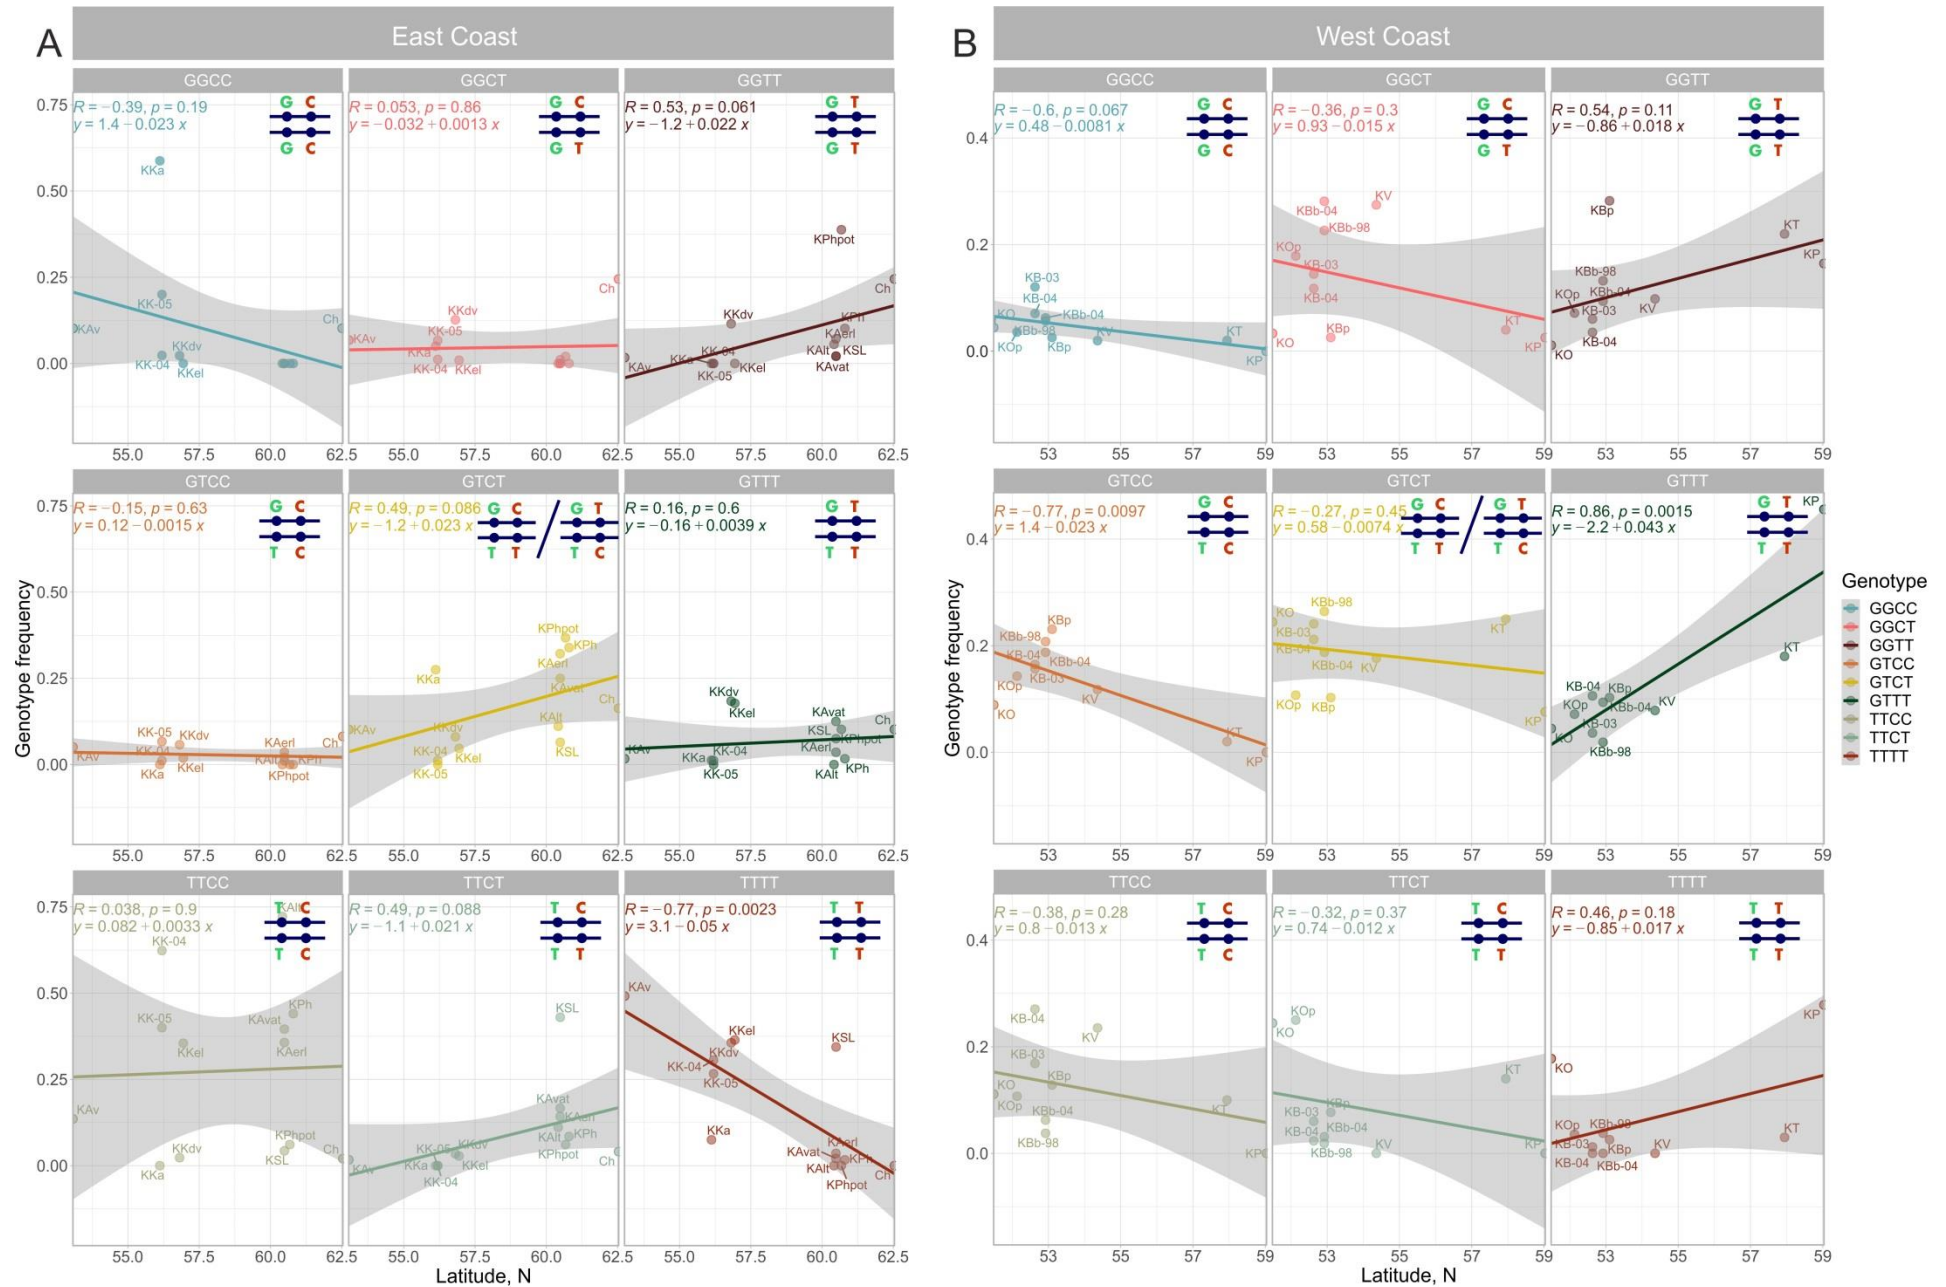

**Figure S4.** Plots of genotypes frequencies as a function of the river mouth latitude for sockeye salmon from East (A) and West (B) Kamchatka coasts.

**Table S1:** Sampling regions and locations, population IDs and sampling methodology: date and place of catch, coordinates of a river mouth or a lake of catch, fishing gear and collector name if known.

| #  | Region                                    | Location                          | Pop. ID | Date of catch             | Place of catch                                                      | Coordinates                  | Fishing gear              | Collector                                                |
|----|-------------------------------------------|-----------------------------------|---------|---------------------------|---------------------------------------------------------------------|------------------------------|---------------------------|----------------------------------------------------------|
| 1  | Chukotka,<br>Navarin region               | Vaamochka Lake                    | Ch      | 28.07.2004                | The creek between the<br>Lower Vaamochka Lake<br>and Vaamochka Lake | 62.540115°N,<br>176.813305°E | fixed nets,<br>seine nets | E.V. Golub (Pacific<br>branch of the VNIRO<br>("TINRO")) |
| 2  |                                           | Severnaya Lagoon                  | KSL     | 26.06.2002                | no data                                                             | 60.49301°N,<br>170.808728°E  | no data                   | no data                                                  |
| 3  |                                           | Anana Lagoon                      | KAL     | 24.06.2002                | no data                                                             | 60.078283°N,<br>170.241658°E | no data                   | no data                                                  |
| 4  |                                           | Apuka River, Lake<br>Vatit        | KAvat   | 07.08.2002                | no data                                                             | 60.484638°N,<br>170.351952°E | no data                   | no data                                                  |
| 5  | Kamchatka<br>peninsula, Olyutor<br>region | Apuka River, early run            | KAerl   | 24.06.2008-<br>25.06.2008 | The lower reaches                                                   | 60.418785°N,<br>169.849153°E | seine nets                | V.I. Roy (VNIRO)                                         |
| 6  |                                           | Apuka River, late run             | KAlt    | 24.06.2008-<br>25.06.2008 | The lower reaches                                                   | 60.418785°N,<br>169.849153°E | seine nets                | V.I. Roy (VNIRO)                                         |
| 7  |                                           | Pakhacha River                    | KPh     | 17.06.2005-<br>27.06.2005 | The lower reaches                                                   | 60.799973°N,<br>169.068806°E | seine nets                | E.D. Pavlov (VNIRO)                                      |
| 8  |                                           | Pakhacha River, Lake<br>Potat     | KPhpot  | 29.07.2001                | Potat Lake Basin                                                    | 60.675653°N,<br>167.622585°E | no data                   | no data                                                  |
| 9  |                                           | Kamchatka River, late<br>run      | KK-04   | 29.06.2004-<br>09.07.2004 | Downstream, 5 and 30<br>km from the mouth                           | 56.192783°N,<br>161.997488°E | seine nets                | A.M. Khrustaleva<br>(IGB RAS)                            |
| 10 |                                           | Kamchatka River, early<br>run     | KK-05   | 14.06.2005                | Downstream, 5 and 30<br>km from the mouth                           | 56.192783°N,<br>161.997488°E | seine nets                | V.I. Roy (VNIRO)                                         |
| 11 | Kamchatka<br>peninsula, East<br>coast     | Azabachje Lake,<br>Bushuyka River | KKa     | 03.07.2004,<br>13.07.2004 | Bushuyka River outfall<br>(tributary of Azabachje<br>Lake)          | 56.119205°N,<br>161.854666°E | seine nets                | A.M. Khrustaleva<br>(IGB RAS)                            |
| 12 |                                           | Dvu 'Yurtochnaya<br>River         | KKd     | 1994, 1995                | no data                                                             | 56.767928°N,<br>160.6291°E   | no data                   | no data                                                  |
| 13 |                                           | Elovka River                      | KKe     | 1994, 1995                | no data                                                             | 56.712959°N,<br>160.750667°E | no data                   | no data                                                  |
| 14 |                                           | Avacha River                      | KAv     | 2002                      | no data                                                             | 53.447146°N,<br>158.173002°E | no data                   | no data                                                  |
| 15 | Commander<br>Islands                      | Bering Island,<br>Sarannoye Lake  | BS      | 07.2008                   | Sarannoye Lake                                                      | 55.271646°N,<br>166.146979°E | seine nets                | no data                                                  |

|    |                                               |                                                            |        |                           |                                                                                |                              |                          |                                                                                  |
|----|-----------------------------------------------|------------------------------------------------------------|--------|---------------------------|--------------------------------------------------------------------------------|------------------------------|--------------------------|----------------------------------------------------------------------------------|
| 16 | Continental coast<br>of the Sea of<br>Okhotsk | Okhota River                                               | Okh    | 22.07.2004                | The lower reaches                                                              | 59.469398°N,<br>142.952526°E | seine nets               | Magadan branch of<br>the VNIRO<br>("MagadanNIRO")                                |
| 17 |                                               | Palana River                                               | KP     | 10.07.2003-<br>21.07.2003 | Downstream, 10 km<br>from the mouth                                            | 59.035209°N,<br>160.213639°E | gill nets,<br>seine nets | A.M. Khrustaleva<br>(IGB RAS)                                                    |
| 18 |                                               | Tigil River                                                | KT     | 18.06.2002                | no data                                                                        | 57.871715°N,<br>158.484906°E | no data                  | no data                                                                          |
| 19 |                                               | Bolshaya Vorovskaya<br>River                               | KV     | 17.07.2007-<br>27.07.2007 | The lower reaches                                                              | 54.359467°N,<br>156.095038°E | seine nets               | Kamchatka branch of<br>the VNIRO<br>("KamchatNIRO")                              |
| 20 | Kamchatka<br>peninsula, North-<br>West        | Bolshaya River                                             | KB-03  | 23.07.2003-<br>30.07.2003 | Downstream, 5-10 km<br>from the mouth                                          | 52.628162°N,<br>156.26196°E  | seine nets               | A.M. Khrustaleva<br>(IGB RAS)                                                    |
| 21 |                                               | Bolshaya River                                             | KB-04  | 11.08.2004-<br>20.08.2004 | The lower reaches                                                              | 52.628162°N,<br>156.26196°E  | seine nets               | R.A. Zboev, I.N.<br>Kireev (Kamchatka<br>branch of the VNIRO<br>("KamchatNIRO")) |
| 22 |                                               | Bolshaya River<br>drainage, Bistraya<br>River, juveniles   | KBb-04 | 20.07.2004-<br>12.08.2004 | The lower course of<br>Bystraya River, 10 km<br>from the Karymay<br>settlement | 52.92024°N,<br>156.609568°E  | minnow<br>seine          | E.V. Yesin (VNIRO)                                                               |
| 23 |                                               | Bolshaya River<br>drainage, Bistraya<br>River, adult fish  | KBb-98 | 16.08.1998                | no data                                                                        | 52.92024°N,<br>156.609568°E  | no data                  | no data                                                                          |
| 24 | North Kuril<br>Islands                        | Bolshaya River<br>drainage, Plotnikova<br>River, juveniles | KBp    | 09.08.2004-<br>12.08.2004 | Upper reach of<br>Plotnikova River, 10 km<br>from Nachikinskoe Lake            | 53.10024°N,<br>157.756895°E  | minnow<br>seine          | E.V. Yesin (VNIRO)                                                               |
| 25 |                                               | Opala River                                                | KOp    | 17.07.2008-<br>26.08.2008 | The lower reaches                                                              | 52.131653°N,<br>156.476848°E | seine nets               | S.A. Belorusceva<br>(VNIRO)                                                      |
| 26 |                                               | Ozernaya River                                             | KO     | 04.08.2003-<br>07.08.2003 | The lower reaches                                                              | 51.484258°N,<br>156.568087°E | seine nets               | A.M. Khrustaleva<br>(IGB RAS)                                                    |
| 27 |                                               | Shumshu Island,<br>Bettobu Lake<br>(Ostrognyaya Ryver)     | NKS    | 05.08.2008                | Ostrognyaya Ryver<br>(tributary of Bettobu<br>Lake)                            | 50.751485°N,<br>156.264268°E | seine nets               | K.V. Chudanov<br>(VNIRO)                                                         |
| 28 |                                               | Paramushir Island,<br>Glukhoeye Lake<br>(Shumnaya Ryver)   | NKP    | 07.07.2008-<br>13.07.2008 | Shumnaya Ryver (flows<br>into Glukhoeye Lake)                                  | 50.488928°N,<br>155.847357°E | seine nets               | no data                                                                          |

|    |                        |                                  |     |                 |                |                              |            |                                                 |
|----|------------------------|----------------------------------|-----|-----------------|----------------|------------------------------|------------|-------------------------------------------------|
| 29 | South Kuril<br>Islands | Urup Island, Tokotan<br>Lake     | SKU | 07.2008-08.2008 | Tokotan Lake   | 45.858739°N,<br>149.799329°E | seine nets | Sakhalin branch of<br>the VNIRO<br>("SakhNIRO") |
| 30 |                        | Iturup Island,<br>Krasivoye Lake | SKI | 01.10.2006      | Krasivoye Lake | 44.624539°N,<br>147.208965°E | seine nets | Sakhalin branch of<br>the VNIRO<br>("SakhNIRO") |

---

**Table S2:** Characteristics of 29 putative neutral SNP loci.  $n_a$  – mean allelic reachness,  $He$  – mean expected heterosigosity.

| #  | Locus name             | GenBank ID           | Putative location                                                                                                                                   | SNP position | Substitution | Description                   | $n_a$ | $He$     |
|----|------------------------|----------------------|-----------------------------------------------------------------------------------------------------------------------------------------------------|--------------|--------------|-------------------------------|-------|----------|
| 1  | <i>One_ACBP-79</i>     | DQ386287             | acyl-coenzyme A-binding protein (ACBP) gene                                                                                                         | 79           | A/G          | mRNA                          | 2     | 0.459063 |
| 2  | <i>One_ALDOB-135</i>   | DQ386280             | aldolase B (ALDOB) gene, partial sequence                                                                                                           | 135          | G/A          | noncoding region              | 2     | 0.280967 |
| 3  | <i>One_ctgf-301</i>    | DQ386288             | connective tissue growth factor (CTGF) gene                                                                                                         | 287          | G/T          | mRNA                          | 1.174 | 0.003708 |
| 4  | <i>One_E2-65</i>       | DQ025695             | One.E2.31.36 genomic sequence similar to type II keratin E2                                                                                         | 65           | A/G          | mRNA                          | 2     | 0.277674 |
| 5  | <i>One_GPDH2-187</i>   | DQ025724             | One.GPDH.56.48 genomic sequence similar to glycerol-3-phosphate dehydrogenase (GPDH)                                                                | 201          | C/T          | mRNA                          | 2     | 0.209521 |
| 6  | <i>One_HpaI-71</i>     | DQ386294             | One-436 HpaI repeat element-like sequence similar to HpaI repeat element                                                                            | 79           | A/T          | unknown                       | 2     | 0.446899 |
| 7  | <i>One_hsc71-220</i>   | DQ386293             | major heat shock protein-like protein (HSC71) gene, partial sequence                                                                                | 220          | A/C          | intron                        | 2     | 0.38731  |
| 8  | <i>One_IL8r-362</i>    | FM206384, GU570948.1 | Oncorhynchus mykiss partial il-8 gene for interleukin 8, promoter region (interleukin-8 receptors), isolate 98JN-020 chemokine receptor (IL8R) gene | 362          | C/T          | promoter region               | 2     | 0.229921 |
| 9  | <i>One_ins-107</i>     | DQ025686             | One.ins.10.30 genomic sequence similar to insulin gene                                                                                              | 107          | C/T          | unknown                       | 2     | 0.486957 |
| 10 | <i>One_KPNA-422</i>    | DQ386282             | karyopherin alpha 2 (KPNA2) gene                                                                                                                    | 422          | A/G          | unknown                       | 2     | 0.289894 |
| 11 | <i>One_MARCKS-241</i>  | GU570949.1           | myristoylated alanine-rich protein kinase (MARCKS) gene                                                                                             | 241          | A/T          | unknown                       | 1.593 | 0.017187 |
| 12 | <i>One_Ots213-181</i>  | DQ386285             | clone Ots213 genomic sequence                                                                                                                       | 220          | T/G          | unknown                       | 2     | 0.15115  |
| 13 | <i>One_Prl2</i>        | AY353071             | haplotype G prolactin II gene, partial cds (coding sequence)                                                                                        | 187          | G/T          | coding                        | 2     | 0.475204 |
| 14 | <i>One_RAG3-93</i>     | DQ386291             | recombination activating protein (RAG1) gene                                                                                                        | 93           | C/T          | mRNA                          | 1.566 | 0.01597  |
| 15 | <i>One_RFC2-102</i>    | AB435387             | 12-RFa mRNA for 12-RF amide peptide, complete cds                                                                                                   | 112          | A/G          | exon, synonymous substitution | 2     | 0.314809 |
| 16 | <i>One_RFC2-285</i>    | AB435387             | 12-RFa mRNA for 12-RF amide peptide, complete cds                                                                                                   | 259          | A/T          | exon                          | 1.889 | 0.041219 |
| 17 | <i>One_RH2op-395</i>   | DQ386277             | RH2 opsin (RH2op) gene, partial sequence                                                                                                            | 395          | T/G          | unknown                       | 1.723 | 0.024461 |
| 18 | <i>One_STR07</i>       | DQ386286             | clone STR07 genomic sequence                                                                                                                        | 182          | C/G          | unknown                       | 2     | 0.412242 |
| 19 | <i>One_Tf_ex11-750</i> | AH015399.2           | transferrin (Tf) gene                                                                                                                               | 750          | A/G          | exon                          | 2     | 0.460821 |
| 20 | <i>One_Tf_in3-182</i>  | AH015399.2           | transferrin (Tf) gene                                                                                                                               | 182          | A/G          | intron                        | 1.401 | 0.009858 |
| 21 | <i>One_U301_92</i>     | DQ267490             | FK506-binding protein 12-like (FKBP12) gene                                                                                                         | 92           | G/T          | unknown                       | 2     | 0.256543 |
| 22 | <i>One_U404-229</i>    | GU570951.1           | unknown                                                                                                                                             | 229          | C/T          | unknown                       | 1.319 | 0.007403 |
| 23 | <i>One_U502-167</i>    | GU570952.1           | unknown                                                                                                                                             | 167          | A/G          | unknown                       | 1.319 | 0.007403 |
| 24 | <i>One_U503-170</i>    | GU570953.1           | unknown                                                                                                                                             | 170          | G/T          | unknown                       | 2     | 0.364484 |
| 25 | <i>One_U504-141</i>    | GU570954.1           | unknown                                                                                                                                             | 141          | A/C          | unknown                       | 2     | 0.398154 |

|    |                     |            |                                                                                    |     |     |         |       |          |
|----|---------------------|------------|------------------------------------------------------------------------------------|-----|-----|---------|-------|----------|
| 26 | <i>One_U508-533</i> | GU570955.1 | unknown                                                                            | 162 | C/T | unknown | 2     | 0.218885 |
| 27 | <i>One_VIM-569</i>  | DQ386292   | vimentin (VIM) gene                                                                | 563 | A/G | unknown | 2     | 0.147    |
| 28 | <i>One_ZNF-61</i>   | BT057144   | clone ssal-evf-521-115 Zinc finger CCCH domain-containing protein 15 putative mRNA | 61  | C/A | unknown | 2     | 0.361891 |
| 29 | <i>One_Zp3b-49</i>  | DQ025739   | clone One.Zp3b.93.69 genomic sequence similar to ZPC4                              | 49  | A/C | unknown | 1.835 | 0.034074 |

---

**Table S3:** Population IDs and summary statistics for the two MHC loci including allelic richness( $n_a$ ), expected heterozygosity ( $H_e$ ), observed heterozygosity ( $H_o$ ), the inbreeding coefficients ( $F_{is}$ ), the results of the exact tests on Hardy–Weinberg equilibrium (HWE). In HWE test results, an asterisk means that the p-value is less than the significance level for accepting the null hypothesis.

| #  | Population ID | MHC2_190v2 |         |       |         |          | MHC2_251v2 |         |       |         |          |
|----|---------------|------------|---------|-------|---------|----------|------------|---------|-------|---------|----------|
|    |               | $H_o$      | $H_e$   | $n_a$ | HWE $p$ | $F_{is}$ | $H_o$      | $H_e$   | $n_a$ | HWE $p$ | $F_{is}$ |
| 1  | Ch            | 0.346939   | 0.36293 | 2     | 0.7075  | 0.044    | 0.44898    | 0.49485 | 2     | 0.567   | 0.094    |
| 2  | KSL           | 0.150538   | 0.19297 | 1.976 | 0.0637  | 0.221    | 0.505376   | 0.42738 | 2     | 0.0901  | -0.184   |
| 3  | KAL           | 0.026316   | 0.02614 | 1.357 | 1       | -0.007   | 0.039474   | 0.03895 | 1.485 | 1       | -0.014   |
| 4  | KAvat         | 0.395833   | 0.34539 | 2     | 0.4195  | -0.148   | 0.416667   | 0.47368 | 2     | 0.5369  | 0.121    |
| 5  | KAer          | 0.392857   | 0.39935 | 2     | 1       | 0.017    | 0.464286   | 0.47727 | 2     | 1       | 0.028    |
| 6  | KAlt          | 0.111111   | 0.20317 | 2     | 0.1688  | 0.46     | 0.222222   | 0.28571 | 2     | 0.39    | 0.227    |
| 7  | KPh           | 0.355932   | 0.40635 | 2     | 0.3475  | 0.125    | 0.423729   | 0.45734 | 2     | 0.5779  | 0.074    |
| 8  | KPhpot        | 0.469388   | 0.46392 | 2     | 1       | -0.012   | 0.44898    | 0.41237 | 2     | 0.7272  | -0.09    |
| 9  | KK-04         | 0.035294   | 0.10087 | 1.834 | 0.0003* | 0.651    | 0.023529   | 0.44441 | 2     | 0*      | 0.947    |
| 10 | KK-05         | 0.066667   | 0.43448 | 2     | 0.0021* | 0.851    | 0.066667   | 0.43448 | 2     | 0.0021* | 0.851    |
| 11 | KKa           | 0.2875     | 0.34395 | 2     | 0.1858  | 0.165    | 0.325      | 0.37736 | 2     | 0.2373  | 0.14     |
| 12 | KKd           | 0.321839   | 0.49166 | 2     | 0.0019* | 0.347    | 0.241379   | 0.34981 | 2     | 0.01    | 0.311    |
| 13 | Kke           | 0.242991   | 0.22851 | 1.989 | 0.6901  | -0.064   | 0.084112   | 0.48813 | 2     | 0*      | 0.828    |
| 14 | Kav           | 0.169492   | 0.39867 | 2     | 0*      | 0.577    | 0.186441   | 0.47588 | 2     | 0*      | 0.61     |
| 15 | BS            | 0.604651   | 0.50342 | 2     | 0.2263  | -0.204   | 0.511628   | 0.44432 | 2     | 0.4855  | -0.154   |
| 16 | Okh           | 0.141026   | 0.13193 | 1.913 | 1       | -0.069   | 0.24359    | 0.2153  | 1.987 | 0.5907  | -0.132   |
| 17 | KP            | 0.531646   | 0.49923 | 2     | 0.651   | -0.065   | 0.101266   | 0.09675 | 1.822 | 1       | -0.047   |
| 18 | KT            | 0.45       | 0.50246 | 2     | 0.3216  | 0.105    | 0.43       | 0.46025 | 2     | 0.5194  | 0.066    |
| 19 | KV            | 0.372549   | 0.49253 | 2     | 0.0921  | 0.245    | 0.45098    | 0.48554 | 2     | 0.7704  | 0.072    |
| 20 | KB-03         | 0.433735   | 0.49945 | 2     | 0.2708  | 0.132    | 0.445783   | 0.44578 | 2     | 1       | 0        |
| 21 | KB-04         | 0.482353   | 0.50045 | 2     | 0.8279  | 0.036    | 0.352941   | 0.43606 | 2     | 0.0852  | 0.192    |
| 22 | KBb-04        | 0.46875    | 0.44792 | 2     | 1       | -0.047   | 0.5        | 0.5     | 2     | 1       | 0        |
| 23 | KBb-98        | 0.490566   | 0.45283 | 2     | 0.7586  | -0.084   | 0.509434   | 0.49829 | 2     | 1       | -0.023   |
| 24 | KBp           | 0.435897   | 0.50117 | 2     | 0.5196  | 0.132    | 0.205128   | 0.50616 | 2     | 0.0003* | 0.598    |
| 25 | KOp           | 0.321429   | 0.50325 | 2     | 0.0667  | 0.366    | 0.535714   | 0.50325 | 2     | 1       | -0.066   |
| 26 | KO            | 0.377778   | 0.40348 | 2     | 0.6009  | 0.064    | 0.522222   | 0.50273 | 2     | 0.8329  | -0.039   |
| 27 | NKS           | 0.446809   | 0.35072 | 2     | 0.0879  | -0.278   | 0.425532   | 0.48685 | 2     | 0.5431  | 0.127    |
| 28 | NKP           | 0.170213   | 0.22512 | 1.993 | 0.141   | 0.246    | 0.170213   | 0.22512 | 1.993 | 0.141   | 0.246    |
| 29 | SKI           | 0.425532   | 0.43926 | 2     | 1       | 0.032    | 0.574468   | 0.50538 | 2     | 0.3906  | -0.138   |
| 30 | SKU           | 0.305556   | 0.26252 | 1.999 | 0.5694  | -0.167   | 0.5        | 0.50078 | 2     | 1       | 0.002    |

**Table S4:** Results of bottleneck tests using 29 putative neutral loci:  $N$  – mean sample size,  $n_a$  – mean allelic richness,  $He$  – mean expected heterosigosity,  $p\_sign\_IAM$  – results of "sign test" for loci evolving under the Infinite Allele Model (IAM),  $p\_stdv\_IAM$  – results of "standardized differences test", IAM,  $p\_W\_1t\_IAM$  and  $p\_W\_2t\_IAM$  – results of one-tail and two-tail "Wilcoxon sign-rank tests", IAM.

| Population | $N$    | $n_a$ | $He$    | $p\_sign\_IAM$ | $p\_stdv\_IAM$ | $p\_W\_1t\_IAM$ | $p\_W\_2t\_IAM$ | Bottleneck decision |
|------------|--------|-------|---------|----------------|----------------|-----------------|-----------------|---------------------|
| BS         | 97.8   | 1.7   | 0.1528  | 0.327558       | 0.208627       | 0.226184        | 0.452368        |                     |
| Ch         | 99.13  | 1.77  | 0.23813 | 0.003863**     | 0.000165***    | 0.000488        | 0.000976***     | Yes                 |
| KAL        | 156    | 1.78  | 0.21175 | 0.008898**     | 0.002628**     | 0.017528        | 0.035056*       | Yes                 |
| KAlt       | 35.8   | 1.83  | 0.22337 | 0.179364       | 0.156892       | 0.190492        | 0.380984        |                     |
| KAerl      | 57.53  | 1.77  | 0.23499 | 0.0001***      | 0.00297**      | 0.001937        | 0.003874**      | Yes                 |
| KAv        | 120    | 1.86  | 0.20436 | 0.101588       | 0.044323*      | 0.07575         | 0.151501        |                     |
| KAvat      | 102    | 1.79  | 0.21671 | 0.002071**     | 0.006405**     | 0.013768        | 0.027535*       | Yes                 |
| KB-03      | 179.87 | 1.87  | 0.22058 | 0.036702*      | 0.00393**      | 0.009489        | 0.018977*       | Yes                 |
| KBb-04     | 65.93  | 1.8   | 0.2191  | 0.077193       | 0.023333*      | 0.053691        | 0.107383        |                     |
| KBb-98     | 112    | 1.75  | 0.2087  | 0.032883*      | 0.004519**     | 0.011927        | 0.023854*       | Yes                 |
| KB-04      | 178.33 | 1.9   | 0.23748 | 0.007995**     | 0.001252**     | 0.0056          | 0.0112*         | Yes                 |
| KBp        | 77.53  | 1.77  | 0.21499 | 0.084393       | 0.007451**     | 0.026115        | 0.05223         |                     |
| KK-04      | 188.27 | 1.8   | 0.22647 | 0.00128**      | 0.000341***    | 0.002405        | 0.004811**      | Yes                 |
| KK-05      | 29.87  | 1.67  | 0.24117 | 0.000945***    | 0.000524***    | 0.000845        | 0.00169**       | Yes                 |
| KKa        | 160.2  | 1.8   | 0.24122 | 0.000052***    | 0.000053***    | 0.00079         | 0.00158**       | Yes                 |
| KKdv       | 176    | 1.79  | 0.24928 | 0.00018***     | 0.000009***    | 0.000252        | 0.000504***     | Yes                 |
| KKel       | 218    | 1.79  | 0.25122 | 0.000028***    | 0.000003***    | 0.000252        | 0.000504***     | Yes                 |
| KO         | 187.73 | 1.9   | 0.20792 | 0.020481*      | 0.020554*      | 0.061267        | 0.122534        |                     |
| KOp        | 61.8   | 1.8   | 0.22114 | 0.06566        | 0.018294*      | 0.039365        | 0.078729        |                     |
| KP         | 171    | 1.77  | 0.22532 | 0.000632***    | 0.000183***    | 0.00083         | 0.00166**       | Yes                 |
| KPh        | 117.8  | 1.93  | 0.23153 | 0.007872**     | 0.016755*      | 0.047282        | 0.094564        |                     |
| KPhpot     | 100    | 1.75  | 0.18778 | 0.011715*      | 0.04337*       | 0.0479          | 0.095799        |                     |
| KSL        | 196    | 1.93  | 0.21522 | 0.033468*      | 0.019932*      | 0.031515        | 0.06303         |                     |
| KT         | 214    | 1.82  | 0.17787 | 0.049546*      | 0.057458       | 0.129726        | 0.259452        |                     |
| KV         | 101.8  | 1.83  | 0.21086 | 0.079785       | 0.023837*      | 0.025788        | 0.051576        |                     |
| NKP        | 94.33  | 1.73  | 0.16148 | 0.230816       | 0.185691       | 0.176749        | 0.353498        |                     |
| NKS        | 95.67  | 1.73  | 0.17836 | 0.230149       | 0.067458       | 0.13076         | 0.26152         |                     |
| Okh        | 158.67 | 1.77  | 0.21268 | 0.008269**     | 0.001021**     | 0.008936        | 0.017873*       | Yes                 |
| SKI        | 99.8   | 1.47  | 0.1371  | 0.061021       | 0.010085*      | 0.017639        | 0.035278*       |                     |
| SKU        | 71.4   | 1.6   | 0.15371 | 0.162133       | 0.06958        | 0.044884        | 0.089767        |                     |

**Table S5:** Results of bottleneck tests based on M-ratio for 11 microsatellite loci. *L1*, *L2* - sizes of the largest and smallest alleles, *l* - repeat length, *k* – number of repeats, *r* - difference between the sizes of the largest and smallest alleles expressed in repeats number.

| Loci          | <i>L1</i> | <i>L2</i> | <i>l</i> | <i>k</i> | <i>r</i> | M-ratio  | Bottleneck decision |
|---------------|-----------|-----------|----------|----------|----------|----------|---------------------|
| <i>Ots2</i>   | 155       | 179       | 2        | 11       | 13       | 0.846154 |                     |
| <i>Ots100</i> | 156       | 205       | 2        | 16       | 25.5     | 0.627451 | Yes                 |
| <i>Ots103</i> | 150       | 214       | 4        | 16       | 17       | 0.941176 |                     |
| <i>Ots107</i> | 80        | 126       | 4        | 6        | 12.5     | 0.48     | Yes                 |
| <i>Ots108</i> | 125       | 203       | 4        | 18       | 20.5     | 0.878049 |                     |
| <i>One8</i>   | 125       | 215       | 2        | 8        | 46       | 0.173913 | Yes                 |
| <i>Omy77</i>  | 103       | 119       | 2        | 8        | 9        | 0.888889 |                     |
| <i>Oki1a</i>  | 110       | 118       | 4        | 3        | 3        | 1        |                     |
| <i>Oki6</i>   | 101       | 115       | 2        | 5        | 8        | 0.625    | Yes                 |
| <i>Oki16</i>  | 349       | 395       | 4        | 8        | 12.5     | 0.64     | Yes                 |
| <i>Oki29</i>  | 310       | 432       | 4        | 17       | 31.5     | 0.539683 | Yes                 |
